# Supplementary material for: Potential Therapeutic Use of Aptamers against HAT1 in Lung Cancer
Source: MDPI journal article supplement (doi:10.3390/cancers15010227), 2022-12-30
Supplement: s1 [file s1]

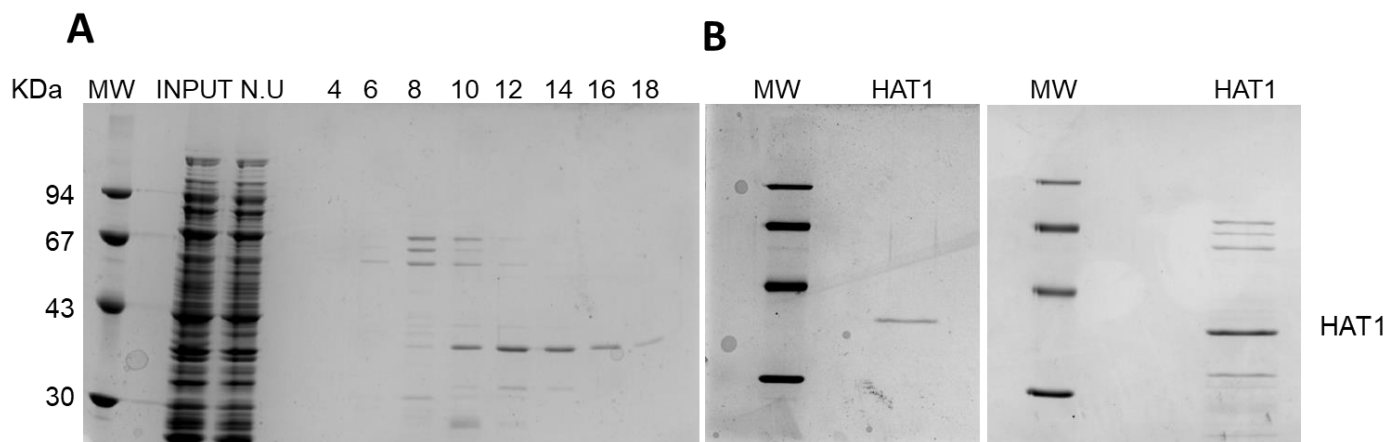

**Figure S1. Purification of recombinant His-HAT1 protein.** (A) SDS-PAGE 12% polyacrylamide gels stained with Coomassie blue showing the fractions where eluted His-HAT1 (B) Fractions containing His-HAT1 were pooled, resolved in SDS-PAGE and stained with Coomassie blue to determine the purity and quantify the amount of purified protein. The recombinant protein has a purity of 68-85% and an expected molecular weight of 37.7 kDa. MW: Molecular weight marker. N.U. non-bound.

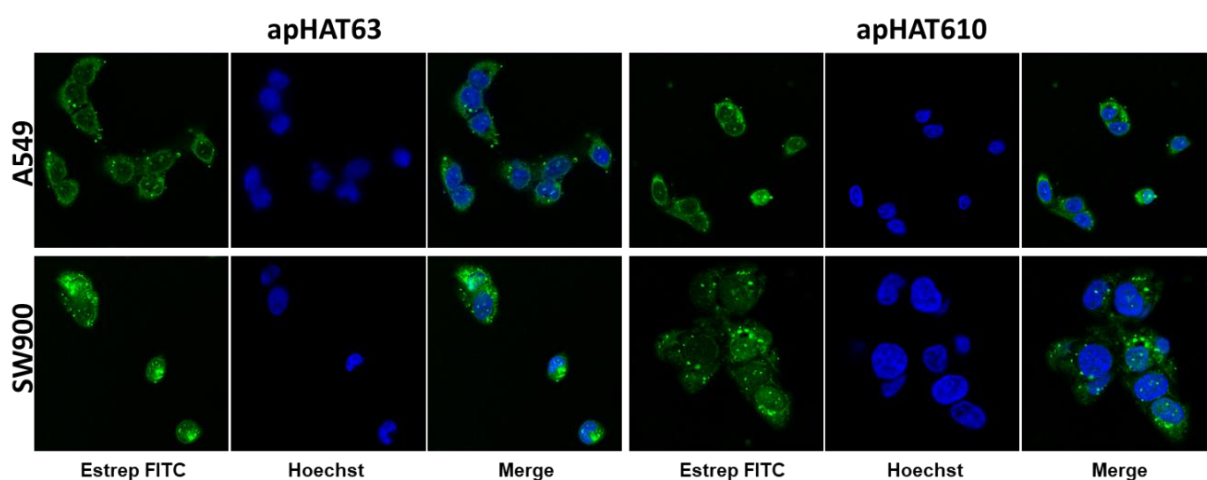

**Figure S2. Cellular uptake and subcellular localization of the aptamers.** The entry of the aptamers into the cell was confirmed after transfection of the cells A549 and SW900 with biotin-conjugated aptamers. Twenty-four hours post transfection, cells were fixed with absolute methanol and incubated with streptavidin-HRP 1/200. Finally, the cells were mounted on glass slides using glycerol-buffer containing p-phenyl-enediamine and 30  $\mu\text{mol/l}$  bis-benzamide (Hoechst 33342) for nuclear staining. Confocal microscopy images corresponding to the staining of nuclei with Hoechst (blue) and aptamers (green). Objective 60X. The aptamers are located in the cytoplasm and the nucleus in both cell lines.

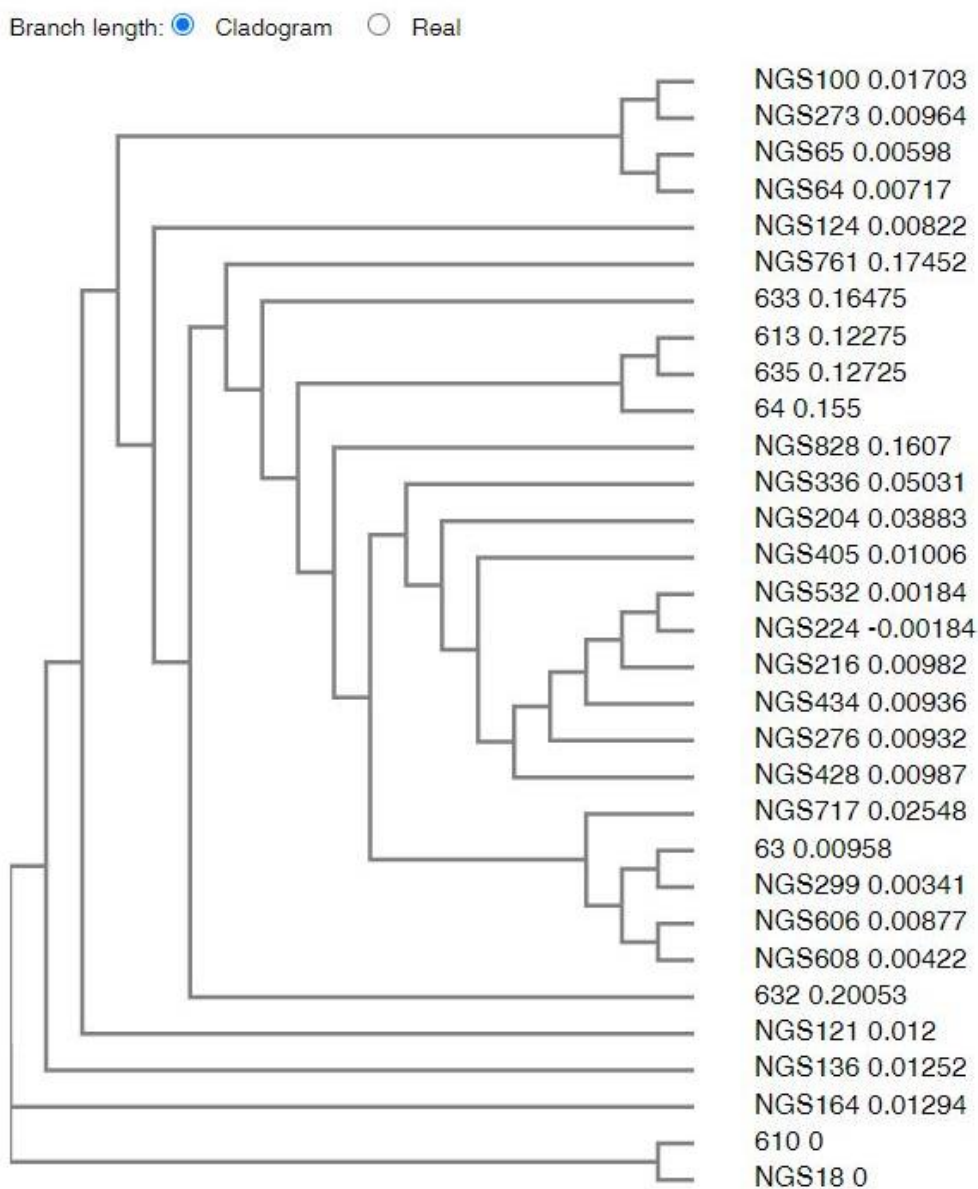

**Figure S3. Phylogenetic dendrogram.** A Neighbour-joining tree without distance corrections was generated using Clustal tools for multiple sequences alignment (EMBL-EBI Services, <https://www.ebi.ac.uk/Tools/msa/clustalo/>). The twenty-four sequences more represented in the NGS analysis and the seven sequences from cloning were compared.

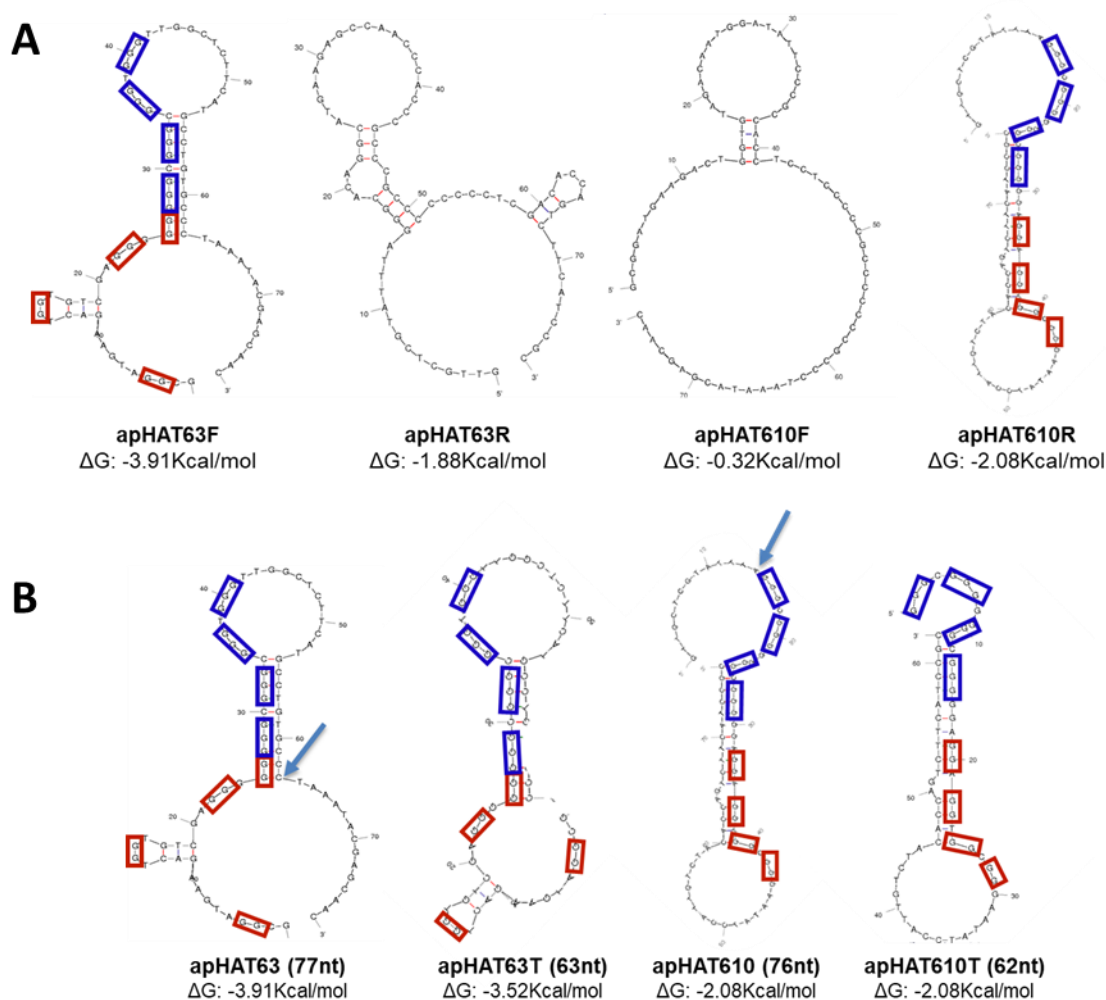

**Figure S4. Secondary and G-quadruplex structures.** Possible prediction of secondary structures and G-quadruplexes of selected aptamers by bioinformatic analysis of sequences with mFold and QGRS Mapper programs. Red and blue boxes indicate the G-quadruplex groups in the (A) apHAT63 and apHAT610 F and R sequences, and (B) apHAT63 and apHAT610 and their truncates. Arrows in the parental aptamers indicate the sequence cleavage site.

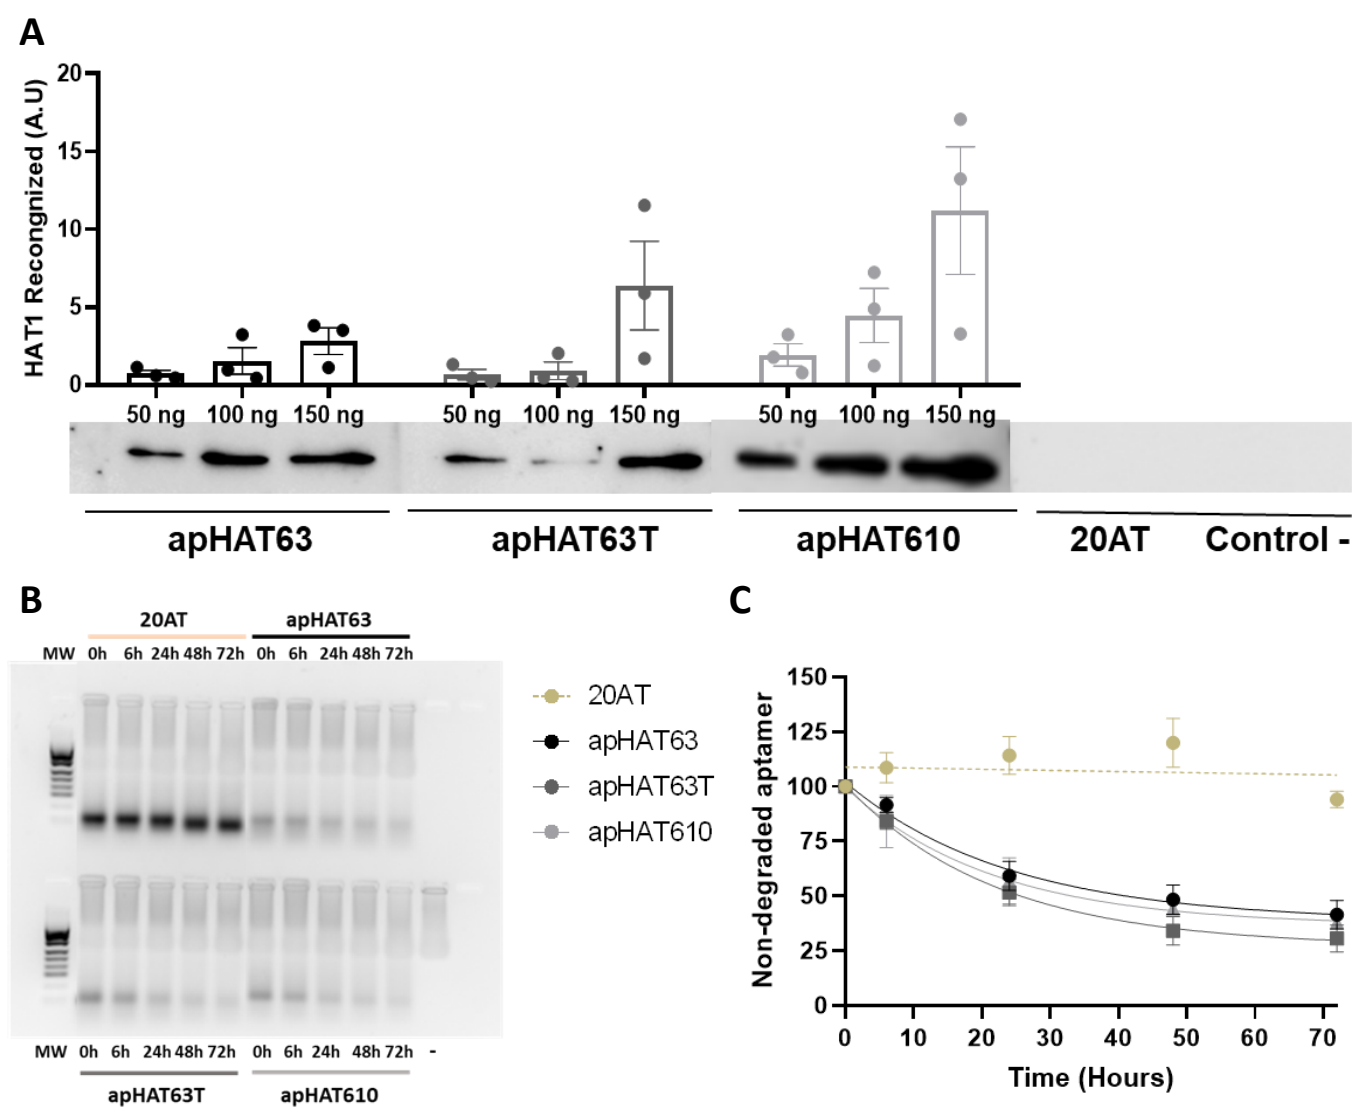

**Figure S5. Affinity of the aptamers by denatured HAT1 and stability in plasma (A)** Aptamer-western blot with increasing concentrations of recombinant HAT1 protein at 50, 100 and 150 ng (1.25, 2.5 and 3.75 pmoles) that were incubated with a 50 nM concentration of each aptamer. The graph represents the mean  $\pm$  SEM of 3 independent experiments. The image corresponds to a representative experiment. **(B)** Stability of aptamers in human plasma. The aptamers (600 ng) were incubated in the presence of human plasma, samples were obtained at 0h, 6h, 24h, 48h and 72h and loaded on a 3% agarose gel. The negative control (-) consists of buffer and human plasma. The image corresponds to a representative assay. **(C)** Quantification of the amount of undegraded aptamer. Data are expressed as percentage of undegraded aptamer with respect to time 0h. The graph represents the mean  $\pm$  SEM of 3 independent experiments.

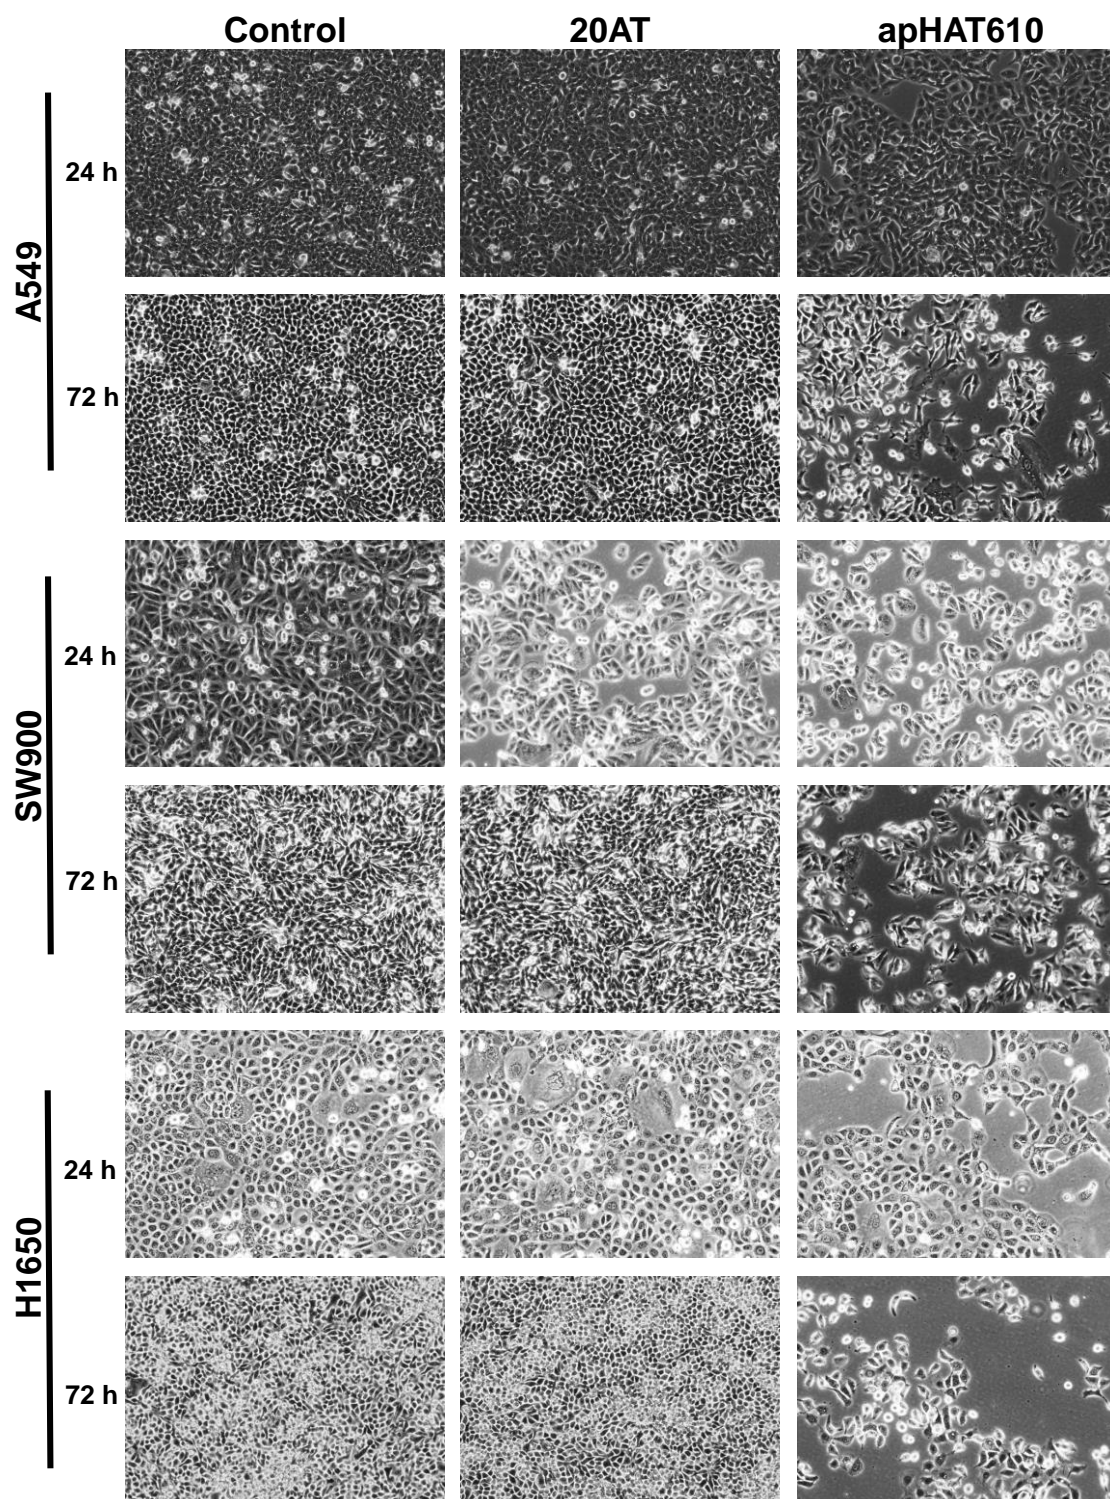

**Figure S6. Effect of apHAT610 on cell growth of the 3 study lines.** A549, SW900, and H1650 cells were seeded in p96 at a density of  $6 \times 10^3$  cells/well for A549 and 104 cells/well for the other two lines. After 24 hours they were transfected with apHAT610 at a concentration of 2 times the IC<sub>50</sub> for each line, and at the 24 and 72-hour times microscopy images were taken at 10X.

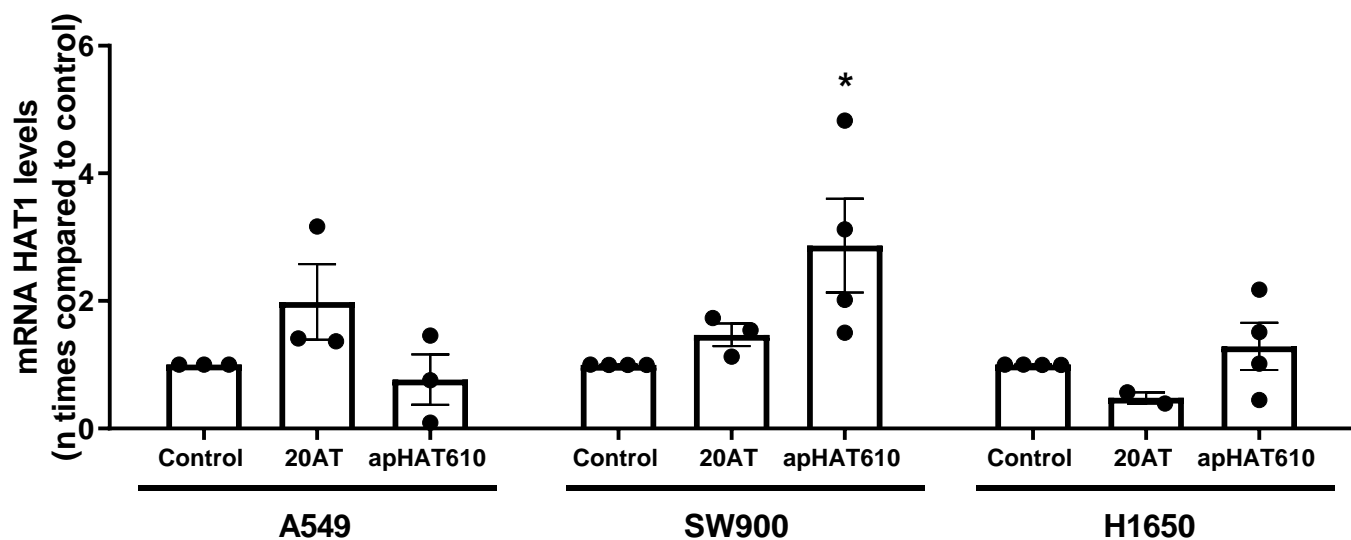

**Figure S7.** Effect of apHAT610 on HAT1 mRNA levels. A549, SW900, and H1650 cells were seeded on p6 at density  $5 \times 10^5$  cells/well and transfected at 24 hours with apHAT610 at previously established working concentrations. After 24 hours, the cells were lifted, and their RNA was extracted. The graph shows the quantification of HAT1 messenger RNA levels by qRT-PCR. Data are expressed as  $2^{-\Delta\Delta Ct}$  and represent the mean  $\pm$  SEM of 3 independent experiments (\* $p < 0.05$  relative to control).

**Table S1. List of oligonucleotides used in this study**

| NAME      | SEQUENCE             |
|-----------|----------------------|
| F3        | GCGGATGAAGACTGGTGT   |
| R3        | GTTGCTCGTATTTAGGGC   |
| T7        | TAATACGACTCACTATAGGG |
| Sp6       | ATTTAGGTGACACTATAGAA |
| 5'HAT1    | GGATGGAGCTACGCTCTTTG |
| 3'HAT1    | GGATGGATCTTCCGCTGTAA |
| 5'β-actin | TGGACTTCGAGCAAGAGATG |
| 3'β-actin | GAAGGAAGGCTGGAAGAGTG |



**Table S2. List of antibodies used in this study**

| Antibody                                           | Company             | MW(kDa) | Clonality/Reactivity | Dilution |
|----------------------------------------------------|---------------------|---------|----------------------|----------|
| $\beta$ -actin                                     | Sigma Aldrich, USA  | 45      | Monoclonal/Mouse     | 1/10000  |
| Cleaved PARP (Asp <sub>214</sub> )                 | Cell Signaling, USA | 89      | Policlonal/Rabbit    | 1/1000   |
| HAT1                                               | Genetex, USA        | 50      | Policlonal/Rabbit    | 1/5000   |
| Acetyl-Histone H4<br>(Lys5, Lys8, Lys12,<br>Lys16) | Invitrogen, USA     | 15      | Policlonal/Rabbit    | 1/5000   |
| Histone H4                                         | Abcam, UK           | 11      | Policlonal/Rabbit    | 1/1000   |

**Table S3. List of aptamers used in this study**

| Aptamer   | Sequence                                                                           |
|-----------|------------------------------------------------------------------------------------|
| apHAT63   | GCGGATGAAGACTGGTGTCTGAGGGGGGGGCGGGCGGGTGGGTTGGCT<br>CTTCATGCCTGTGCCCTAAATACGAGCAAC |
| apHAT63T  | GCGGATGAAGACTGGTGTCTGAGGGGGGGGCGGGCGGGTGGGTTGGCT<br>CTTCATGCCTGTGCCC               |
| apHAT610  | GTTGCTCGTATTTAGGGCGGGGGGGCGGGGGAGGAGGTGGCGGGAATA<br>TCCATTGTCTACACCAGTCTTCATCCGC   |
| apHAT610T | GGGCGGGGGGGCGGGGGAGGAGGTGGCGGGAATATCCATTGTCTACA<br>CCAGTCTTCATCCGC                 |
| 20AT      | GCGGATGAAGACTGGTGTAAAAAAAAAAAAAAAAAAAAATTTTTTTTTTTTTT<br>TTTTTGGCCCTAAATACGAGCAAC  |

Figure 4C

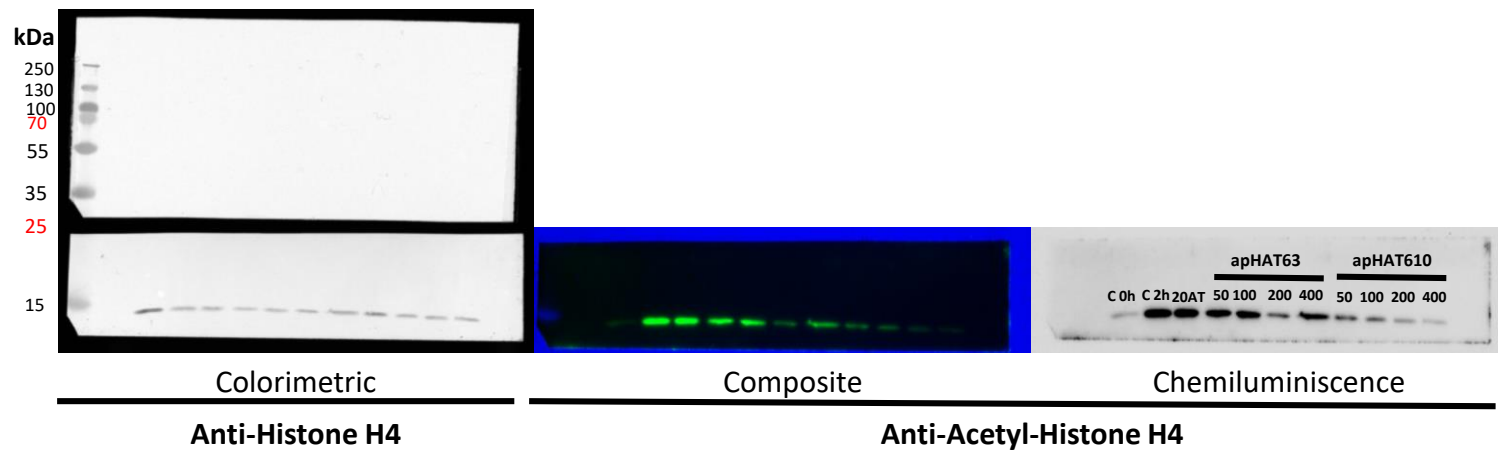

| LINE                           | T0h C    | T2h C    | 20AT     | apHAT63 50 nM | apHAT63 100 nM | apHAT63 200 nM | apHAT63 400 nM | apHAT610 50 nM | apHAT610 100 nM | apHAT610 200 nM | apHAT610 400 nM |
|--------------------------------|----------|----------|----------|---------------|----------------|----------------|----------------|----------------|-----------------|-----------------|-----------------|
| Anti-Acetyl-Histone H4. (A.U.) | 175890   | 1991862  | 1654644  | 1258408       | 1186566        | 335410         | 904545         | 348466         | 249492          | 152524          | 86802           |
| Anti-Histone H4. (A.U.)        | 80960022 | 32953635 | 30407091 | 22167145      | 25143261       | 25673219       | 42034354       | 44998096       | 27637467        | 29160417        | 31518630        |

Figure 4C

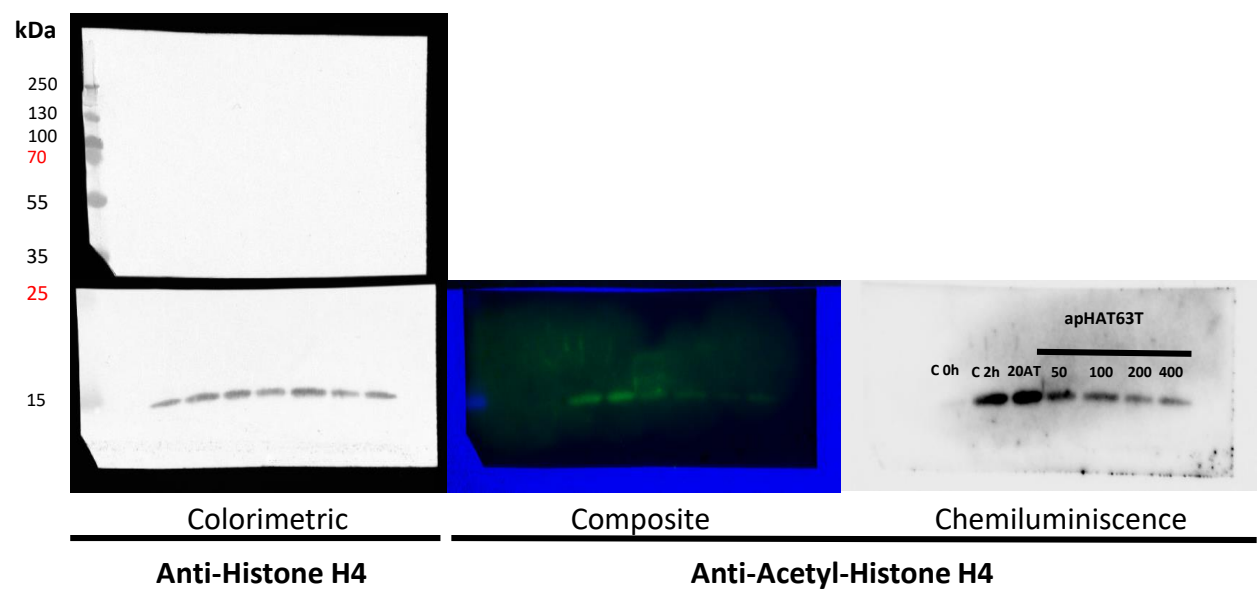

| LINE                           | T0h C    | T2h C    | 20AT     | apHAT63T 50 nM | apHAT63T 100 nM | apHAT63T 200 nM | apHAT63T 400 nM |
|--------------------------------|----------|----------|----------|----------------|-----------------|-----------------|-----------------|
| Anti-Acetyl-Histone H4. (A.U.) | 207864   | 2215780  | 2728600  | 1434160        | 1083320         | 650265          | 688450          |
| Anti-Histone H4. (A.U.)        | 50456499 | 78230607 | 72812744 | 59470164       | 97328088        | 51192269        | 58037920        |

Figure 7

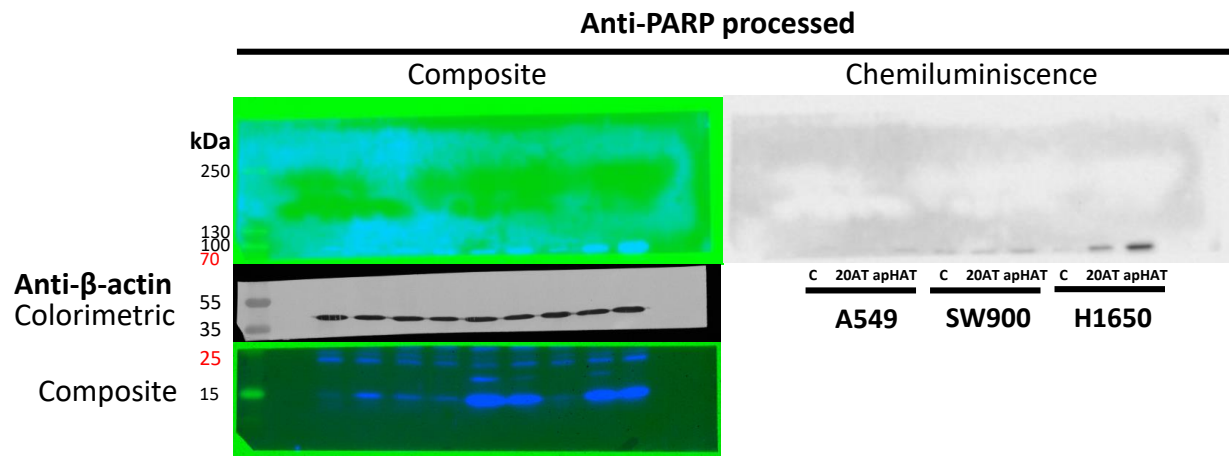

| LINE                             | A549<br>C | A549<br>20AT | A549<br>apHAT610 | SW900<br>C | SW900<br>20AT | SW900<br>apHAT610 | H1650<br>C | H1650<br>20AT | H1650<br>apHAT610 |
|----------------------------------|-----------|--------------|------------------|------------|---------------|-------------------|------------|---------------|-------------------|
| Anti-PARP<br>processed<br>(A.U.) | 486780    | 607770       | 628140           | 549810     | 384480        | 536280            | 357480     | 607140        | 1273650           |
| Anti-β-actin<br>(A.U.)           | 54309840  | 48908240     | 49402485         | 41762288   | 51143008      | 49565400          | 56791254   | 58725480      | 71502840          |

Figure 8A

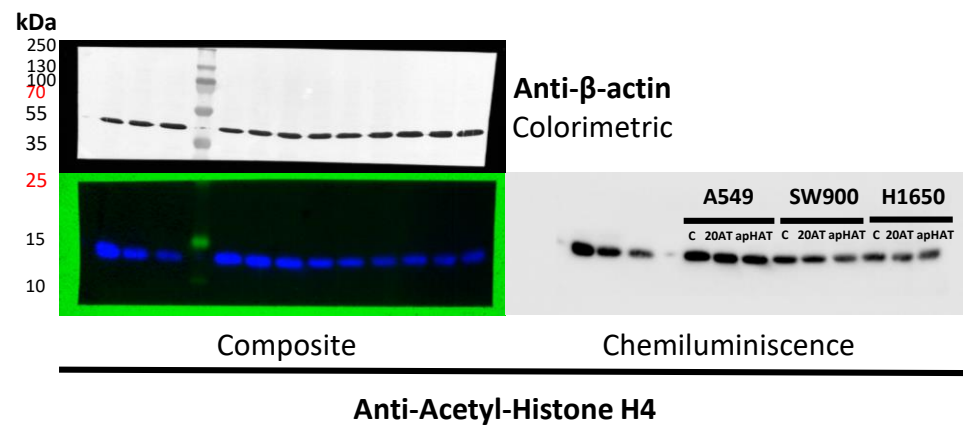

| LINE                          | A549<br>C | A549<br>20AT | A549<br>apHAT | SW900<br>C | SW900<br>20AT | SW900<br>apHAT | H1650<br>C | H1650<br>20AT | H1650<br>apHAT |
|-------------------------------|-----------|--------------|---------------|------------|---------------|----------------|------------|---------------|----------------|
| Anti-Acetyl-Histone H4 (A.U.) | 1466528   | 1287804      | 1172352       | 807998     | 671076        | 541675         | 668740     | 512325        | 569604         |
| Anti-β-actin (A.U.)           | 55596326  | 60374061     | 64029215      | 63329069   | 63666435      | 68454549       | 80940387   | 76912852      | 78838980       |

Figure 8B

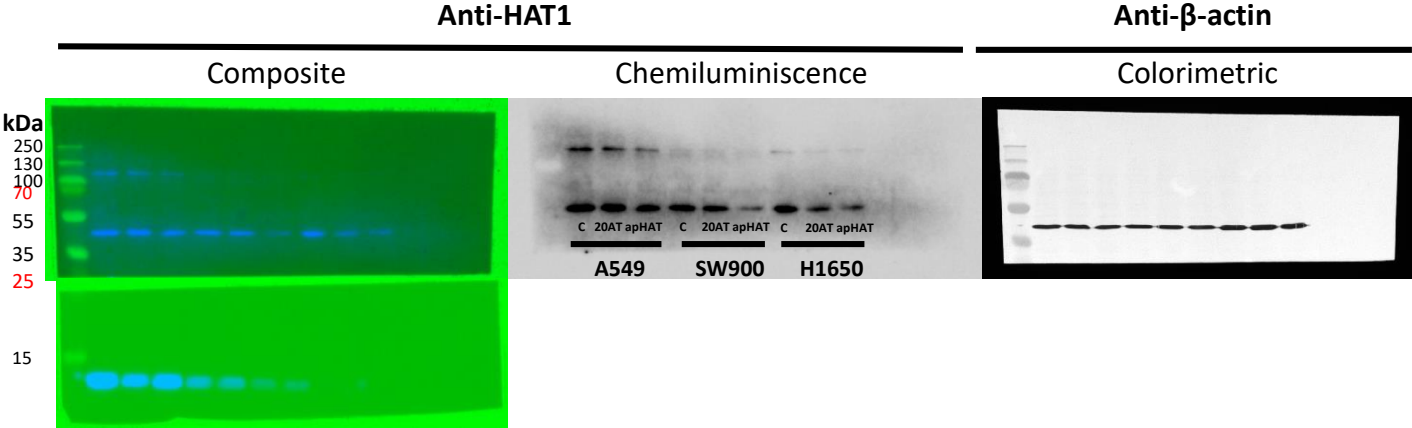

| LINE                           | A549<br>C | A549<br>20AT | A549<br>apHAT | SW900<br>C | SW900<br>20AT | SW900<br>apHAT | H1650<br>C | H1650<br>20AT | H1650<br>apHAT |
|--------------------------------|-----------|--------------|---------------|------------|---------------|----------------|------------|---------------|----------------|
| Anti-HAT1<br>(A.U.)            | 215384    | 200300       | 155125        | 169248     | 135631        | 55335          | 186501     | 80430         | 65436          |
| Anti- $\beta$ -actin<br>(A.U.) | 36818886  | 35437388     | 32057704      | 34741417   | 34322532      | 32370400       | 42229068   | 46146096      | 43470405       |

Figure S5

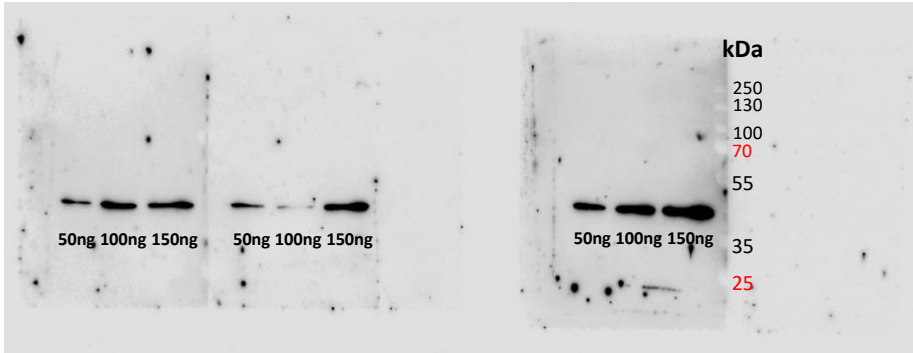

|                 | apHAT63         |                  |                  | apHAT63T         |                   | 20AT              | apHAT610         |                   |                   | Control - |
|-----------------|-----------------|------------------|------------------|------------------|-------------------|-------------------|------------------|-------------------|-------------------|-----------|
| LINE            | apHAT63<br>50ng | apHAT63<br>100ng | apHAT63<br>150ng | apHAT63T<br>50ng | apHAT63T<br>100ng | apHAT63T<br>150ng | apHAT610<br>50ng | apHAT610<br>100ng | apHAT610<br>150ng |           |
| QUANT<br>(A.U.) | 956286          | 2868160          | 2893380          | 983892           | 265860            | 5365144           | 2770803          | 6707434           | 16566466          |           |
